# Supplementary material
Source: Springer Nature journal article supplement (https://www.springermedizin.de/resource/supplementary/13017_2011_210_MOESM2_ESM.pdf/9635712)

[H]

R19

96/1,25

TION - AP

8,1 cGycm<sup>2</sup>

Bettanfnahme auf Station

[F]

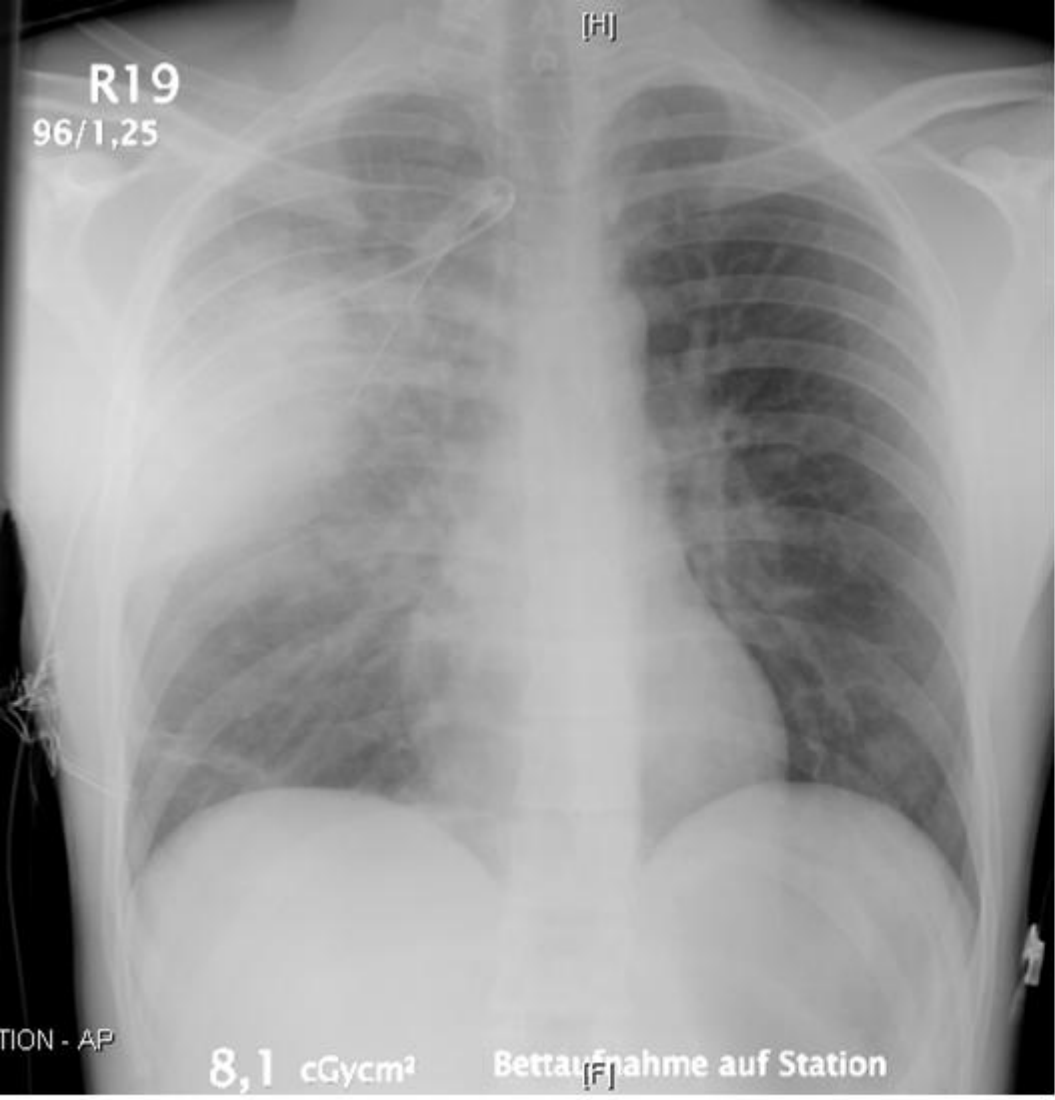

Supplement: MOESM2 [file 9635712]
